# Supplementary material
Source: Springer Nature journal article supplement (https://www.springermedizin.de/resource/supplementary/12913_2013_2984_MOESM2_ESM.pdf/9532704)

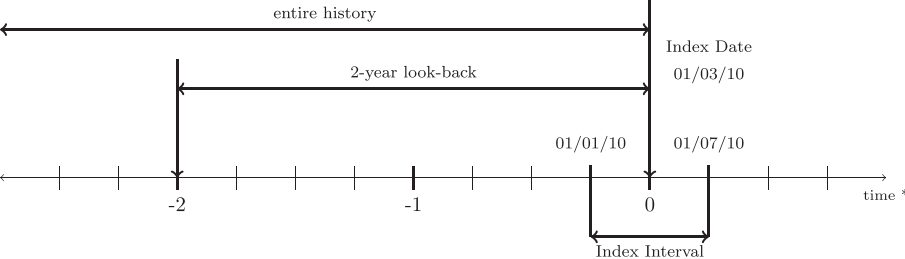

\* 3-month interval

Supplement: MOESM2 [file 9532704]
